# Supplementary material
Source: PubMed Central journal article supplement (PMC7863877)
Supplement: supp_RA120.014625_161217_2_supp_605375_qhhm2r.pdf [file supp_RA120.014625_161217_2_supp_605375_qhhm2r.pdf]

## Supporting Information

### Characterizing human $\alpha$ -1,6-fucosyltransferase (FUT8) substrate specificity and structural similarities with related fucosyltransferases

Bhargavi M. Boruah<sup>1,†</sup>, Renuka Kadirvelraj<sup>2,†</sup>, Lin Liu<sup>1</sup>, Annapoorani Ramiah<sup>1</sup>, Chao Li<sup>3</sup>, Guanghui Zong<sup>3</sup>, Gerlof P. Bosman<sup>4</sup>, Jeong-Yeh Yang<sup>1</sup>, Lai-Xi Wang<sup>3</sup>, Geert-Jan Boons<sup>1</sup>, Zachary A. Wood<sup>2\*</sup>, and Kelley W. Moremen<sup>1,2\*</sup>

<sup>1</sup>Complex Carbohydrate Research Center, University of Georgia, Athens, GA;

<sup>2</sup>Department of Biochemistry and Molecular Biology, University of Georgia, Athens, GA;

<sup>3</sup>Department of Chemistry and Biochemistry, University of Maryland, College Park, MD;

<sup>4</sup>Department of Chemical Biology and Drug Discovery, Utrecht Institute for Pharmaceutical Sciences, and Bijvoet Center for Biomolecular Research, Utrecht University, Utrecht, The Netherlands.

<sup>†</sup> These authors contributed equally to this work.

\* Correspondence: Kelley Moremen: email: [moremen@uga.edu](mailto:moremen@uga.edu) and Zachary A. Wood: email: [zaw@uga.edu](mailto:zaw@uga.edu)

#### **This Supplementary Information includes:**

**Supplementary Table S1:** Kinetic parameters for wild type human FUT8 using GDP-Fucose as donor and various glycan acceptor substrates.

**Supplementary Table S2:** Data collection and refinement statistics

**Supplementary Table S3:** Kinetic parameters for wild type human FUT8 and mutants.

**Supplementary Table S4:** Primer sequences used for site directed mutagenesis.

**Supplementary Figure S1:** FUT8 expression, purification, and tag/glycan cleavage.

**Supplementary Figure S2:** Structural alignment of fucosyltransferase structures using the PROMALS3D server.

**Supplementary Figure S3:** Sequence and structural alignment of FUT8 with other related GTs.

**Supplementary Table S1: Kinetic parameters for wild type human FUT8 using GDP-Fucose as donor and various glycan acceptor substrates.**

| Acceptor Substrates <sup>a</sup> | $k_{\text{cat}}$<br>$s^{-1}$ | $K_m$<br>$\mu M$ | $k_{\text{cat}}/K_m$<br>$mM^{-1}s^{-1}$ |
|----------------------------------|------------------------------|------------------|-----------------------------------------|
| M5N2-Asn-Fmoc                    | $0.2 \pm 0.1$                | $949 \pm 506$    | $0.21 \pm 0.22$                         |
| NM5N2-Asn                        | $6.9 \pm 0.8$                | $214 \pm 64$     | $32 \pm 13$                             |
| M3N2-Asn                         | N.D.                         |                  |                                         |
| A1-Asn                           | $5.9 \pm 0.7$                | $22.5 \pm 7.7$   | $260 \pm 120$                           |
| A2-Asn                           | $13.7 \pm 0.8$               | $51.7 \pm 9.7$   | $265 \pm 65$                            |
| G1-Asn                           | $8.7 \pm 0.6$                | $159 \pm 30$     | $55 \pm 14$                             |
| A3-Asn                           | $7.0 \pm 0.5$                | $556 \pm 82$     | $12 \pm 3$                              |
| A3'-Asn                          | $9.6 \pm 0.9$                | $149 \pm 39$     | $64 \pm 23$                             |
| A4-Asn                           | N.D.                         |                  |                                         |

N.D. not detectable

<sup>a</sup>Fucosyltransferase assays were performed in duplicate with the respective glycan substrates using a GDP-Glo assay format as described in Experimental Procedures. Steady state parameters of  $k_{\text{cat}}$  and  $K_m$  were calculated using a GDP standard curve and nonlinear curve fitting in GraphPad Prism 6 software.

**Supplementary Table S2. Data collection and refinement statistics**

| <b>Data collection</b>                                        | <b>Fut8:GDP</b>          | <b>Fut8:GDP:A2</b>       | <b>Fut8:GDP:A3'</b>      | <b>Fut8:GDP:A3</b>      | <b>Fut8:GDP:NM5N2</b>    |
|---------------------------------------------------------------|--------------------------|--------------------------|--------------------------|-------------------------|--------------------------|
| Wavelength (Å)                                                | 1.0000                   | 1.0000                   | 1.0000                   | 1.0000                  | 1.0000                   |
| Space group                                                   | P6 <sub>5</sub>          | P6 <sub>5</sub> 2 2      | P6 <sub>5</sub> 2 2      | P6 <sub>5</sub>         | P6 <sub>5</sub>          |
| Cell dimensions (a, b, c in Å)                                | 173.5, 173.5, 207.4      | 149.9, 149.9, 480.9      | 150.5, 150.5, 480.3      | 151.7, 151.7, 474.1     | 154.0, 154.0, 466.9      |
| Molecules in asymmetric unit                                  | 4                        | 2                        | 2                        | 8                       | 8                        |
| Completeness (%)                                              | 99.2 (97.1) <sup>a</sup> | 99.3 (97.1) <sup>a</sup> | 89.4 (93.6) <sup>a</sup> | 99.8 (100) <sup>a</sup> | 99.3 (99.9) <sup>a</sup> |
| Total number of reflections                                   | 837360 (49014)           | 1290703 (103944)         | 149167 (11496)           | 1120885 (87009)         | 367570 (28430)           |
| Unique reflections                                            | 165616 (11970)           | 124545 (8849)            | 44367 (3352)             | 219502 (16316)          | 102079 (7647)            |
| Redundancy                                                    | 5.1 (4.1)                | 10.4 (11.7)              | 3.4 (3.4)                | 5.1 (5.3)               | 3.6 (3.7)                |
| <i>I</i> / $\sigma(I)$                                        | 10.4 (1.5)               | 18.4 (2.3)               | 7.9 (1.8)                | 10.7 (1.4)              | 5.7 (1.2)                |
| <i>R</i> <sub>meas</sub> <sup>b</sup> (%)                     | 15.8 (109.7)             | 15.3 (146.6)             | 19.2 (92.9)              | 12.0 (105.3)            | 25.9 (139.7)             |
| <i>CC</i> <sub>1/2</sub> (%)                                  | 99.5 (55.6)              | 99.9 (76.1)              | 99.0 (68.9)              | 99.7 (50.5)             | 98.5 (50.9)              |
| <b>Refinement</b>                                             |                          |                          |                          |                         |                          |
| Resolution and highest-resolution shell (Å)                   | 2.25 (2.31-2.25)         | 2.4 (2.46-2.4)           | 3.3 (3.39-3.3)           | 2.47 (2.53-2.47)        | 3.2 (3.28-3.2)           |
| <i>R</i> <sub>work</sub> / <i>R</i> <sub>free</sub>           | 0.17 / 0.20              | 0.205 / 0.23             | 0.20 / 0.22              | 0.167 / 0.20            | 0.19 / 0.236             |
| No. of atoms Protein / Ligand / Solvent                       | 14987 / 98 / 1351        | 7639 / 236 / 634         | 7600 / 268 / 26          | 30384 / 474 / 769       | 30432 / 752 / 264        |
| <i>B</i> -factor (Å <sup>2</sup> ) Protein / Ligand / Solvent | 41.8 / 32.4 / 50.1       | 50.1 / 45.8 / 56.1       | 69 / 66 / 73.6           | 50.8 / 50.3 / 54.4      | 61.8 / 68.7 / 53.7       |
| Wilson <i>B</i> -factor (Å <sup>2</sup> )                     | 31.7                     | 43                       | 77.1                     | 54.6                    | 64.1                     |
| <b>Stereochemical Ideality</b>                                |                          |                          |                          |                         |                          |
| Bond lengths (Å <sup>2</sup> )                                | 0.009                    | 0.010                    | 0.01                     | 0.005                   | 0.006                    |
| Bond angles (°)                                               | 0.99                     | 1.26                     | 1.3                      | 0.97                    | 0.98                     |
| Ramachandran favored (%)                                      | 97.2                     | 97.2                     | 95.6                     | 96.9                    | 97.0                     |
| Ramachandran allowed (%)                                      | 2.8                      | 2.8                      | 4.4                      | 3.1                     | 3.0                      |
| <b>PDB code</b>                                               | 6X5H                     | 6X5R                     | 6X5S                     | 6X5T                    | 6X5U                     |

<sup>a</sup>Values in parentheses are for highest-resolution shell as defined under Resolution.

<sup>b</sup>*R*<sub>meas</sub> is the redundancy independent merging *R*-factor of Diederichs and Karplus (118).

**Supplementary Table S3: Kinetic parameters for wild type human FUT8 and mutants using GDP-Fucose as donor and A2 substrate as acceptor<sup>a</sup>.**

| Enzyme form           | GFP fluorescence <sup>b</sup> | Acceptor                            |                  |                                     |                                                  | Donor                               |                     |                                     |                                                  |
|-----------------------|-------------------------------|-------------------------------------|------------------|-------------------------------------|--------------------------------------------------|-------------------------------------|---------------------|-------------------------------------|--------------------------------------------------|
|                       |                               | $k_{cat}$<br><i>s</i> <sup>-1</sup> | $K_m$<br>$\mu M$ | $k_{cat}/K_m$<br>$\mu M^{-1}s^{-1}$ | $k_{cat}/K_m$ <sup>d</sup><br>$k_{cat}/K_m$ (WT) | $k_{cat}$<br><i>s</i> <sup>-1</sup> | $K_m$<br>$\mu M$    | $k_{cat}/K_m$<br>$\mu M^{-1}s^{-1}$ | $k_{cat}/K_m$ <sup>d</sup><br>$k_{cat}/K_m$ (WT) |
| WT(293F) <sup>c</sup> | 624                           | 13.7 ± 0.8                          | 51.7 ± 9.7       | 0.26                                |                                                  | 11.2 ± 0.8                          | 67.9 ± 13.0         | 0.16                                |                                                  |
| WT(293S) <sup>c</sup> | 434                           | 5.2 ± 0.4                           | 57.6 ± 18.0      | 0.09                                |                                                  | 2.0 ± 0.3                           | 71.6 ± 22.8         | 0.03                                |                                                  |
| K216A <sup>c</sup>    | 170                           | 0.08 ± 0.01                         | 53.8 ± 16.2      | 0.0015                              | 0.006                                            | 0.05 ± 0.01                         | 66.0 ± 32.5         | 0.0007                              | 0.004                                            |
| D295A <sup>c</sup>    | 381                           | N.D.                                |                  |                                     |                                                  | N.D.                                |                     |                                     |                                                  |
| Q470A <sup>c</sup>    | 547                           | 0.23 ± 0.03                         | 85.9 ± 26.8      | 0.0027                              | 0.010                                            | 0.25 ± 0.19                         | 352 ± 381           | 0.0007                              | 0.004                                            |
| R473A <sup>c</sup>    | 161                           | N.D.                                |                  |                                     |                                                  | N.D.                                |                     |                                     |                                                  |
| D494A <sup>c</sup>    | 165                           | 0.06 ± 0.01                         | 55.5 ± 15.7      | 0.001                               | 0.0045                                           | 0.04 ± 0.01                         | 227 ± 129           | 0.0002                              | 0.001                                            |
| D495A <sup>c</sup>    | 388                           | 0.04 ± 0.01                         | 152 ± 98         | 0.0003                              | 0.0010                                           | 0.03 ± 0.01                         | 271 ± 173           | 0.0001                              | 0.0006                                           |
| Q502A <sup>c</sup>    | 195                           | 0.16 ± 0.02                         | 13.1 ± 5.7       | 0.01                                | 0.05                                             | 0.016 ± 0.003                       | 79.8 ± 35.4         | 0.0002                              | 0.001                                            |
| H535A <sup>c</sup>    | 311                           | 0.70 ± 0.03                         | 30.4 ± 4.7       | 0.02                                | 0.09                                             | -                                   | > 1000 <sup>f</sup> | -                                   | -                                                |
| K541A <sup>c</sup>    | 428                           | 5.8 ± 0.4                           | 38.8 ± 9.8       | 0.15                                | 0.58                                             | 5.2 ± 0.6                           | 183 ± 35            | 0.03                                | 0.18                                             |
| Y498A <sup>c</sup>    | 301                           | N.D.                                |                  |                                     |                                                  | N.D.                                |                     |                                     |                                                  |
| R365A <sup>c</sup>    | 357                           | N.D.                                |                  |                                     |                                                  | N.D.                                |                     |                                     |                                                  |
| D368A <sup>c</sup>    | 271                           | N.D.                                |                  |                                     |                                                  | N.D.                                |                     |                                     |                                                  |
| K369A <sup>c</sup>    | 71                            | N.D.                                |                  |                                     |                                                  | N.D.                                |                     |                                     |                                                  |
| E373A <sup>c</sup>    | 363                           | N.D.                                |                  |                                     |                                                  | N.D.                                |                     |                                     |                                                  |
| Y382A <sup>c</sup>    | 197                           | N.D.                                |                  |                                     |                                                  | N.D.                                |                     |                                     |                                                  |
| D409A <sup>c</sup>    | 253                           | N.D.                                |                  |                                     |                                                  | N.D.                                |                     |                                     |                                                  |
| D453A <sup>c</sup>    | 191                           | N.D.                                |                  |                                     |                                                  | N.D.                                |                     |                                     |                                                  |
| S469A <sup>c</sup>    | 285                           | N.D.                                |                  |                                     |                                                  | N.D.                                |                     |                                     |                                                  |

<sup>a</sup> Fucosyltransferase assays were performed in duplicate with the A2-Asn acceptor and GDP Fucose as donor substrates using a GDP-Glo assay format as described in Experimental Procedures.

<sup>b</sup> The relative expression and secretion of the GFP-FUT8 fusion proteins in transiently transfected HEK293 cells was determined by measuring the fluorescence of the recombinant proteins secreted into the media.

<sup>c</sup> The GFP-FUT8 fusion protein expressed in HEK293S (GnTI-) cells was purified by Ni<sup>2+</sup>-NTA chromatography, cleaved to remove tag sequences and further purified as described for crystallography of the enzyme catalytic domain.

<sup>d</sup> Values for  $k_{cat}/K_m$  for all FUT8 mutants were compared with  $k_{cat}/K_m$  values for wild type FUT8 expressed in HEK293F (wild type) cells.

<sup>e</sup> The GFP-FUT8 fusion protein (and all FUT8 mutants) were expressed in HEK293F (wild type) cells and purified by Ni<sup>2+</sup>-NTA chromatography. The fusion protein tags were retained for the indicated wild type FUT8 and mutant forms of the enzyme during kinetic analyses.

<sup>f</sup> Catalytic activity was detected, but values for  $k_{cat}$  and  $K_m$  could not be determined.

N.D. not detectable

**Supplementary Table S4: Primer sequences used for site directed mutagenesis.** Lower case letters represent bases that were mutated using the Q5 site-directed mutagenesis kit (see Experimental Procedures).

| <b>Mutant</b> | <b>Primer Name</b> | <b>Primer sequence</b>        |
|---------------|--------------------|-------------------------------|
| K216A         | Mut-1_F            | TAATATCAACgcaGGCTGTGGCTATG    |
|               | Mut-1_R            | CACACCAGCTTTTTGGCT            |
| D295A         | Mut-2_F            | TCCCATGTAgccAGTCTTCATC        |
|               | Mut-2_R            | AGCTCGACCACTTGAACA            |
| Q470A         | Mut-3_F            | TTTTTCATCCgcgGTCTGTGCGAGTTG   |
|               | Mut-3_R            | GTACACACTAGGAAGTCTG           |
| R473A         | Mut4_F             | CCAGGTCTGTgcaGTTGCTTATG       |
|               | Mut4_R             | GATGAAAAAGTACACACTAG          |
| D494A         | Mut5_F             | CCATTCTTTAgctGACATCTACTATTTTG |
|               | Mut5_R             | AAGTTTGCAGAGGCATCAG           |
| D495A         | Mut6_F             | TTCTTTAGATgccATCTACTATTTGGG   |
|               | Mut6_R             | TGGAAGTTTGCAGAGGCA            |
| Q502A         | Mut7_F             | TTTTGGGGGcgcaAATGCCACAATC     |
|               | Mut7_R             | TAGTAGATGTCATCTAAAGAATGG      |
| H535A         | Mut8_F             | GGCTGGAATgctTGGGATGGCTATTC    |
|               | Mut8_R             | ACACCAATGATATCTCCAG           |
| K541A         | Mut9_F             | TGGCTATTCTgcaGGTGTCAACAG      |
|               | Mut9_R             | TCCCAATGATTTCCAGCC            |
| Y498A         | Mut10_F            | TGACATCTACgcTTTTGGGGGCC       |
|               | Mut10_R            | TCTAAAGAATGGAAGTTTGC          |
| R365A         | Mut11_F            | AGTCCATGTCgcaCGCACAGAC        |
|               | Mut11_R            | CCAATAACTGGATGTTTG            |
| D368A         | Mut12_F            | AGACGCACAgcTAAAGTGGGAAC       |
|               | Mut12_R            | GACATGGACTCCAATAAC            |
| K369A         | Mut13_F            | ACGCACAGAcgcaGTGGGAACAG       |
|               | Mut13_R            | CTGACATGGACTCCAATAAC          |
| E373A         | Mut14_F            | GTGGGAACAgcaGCTGCCTTC         |
|               | Mut14_R            | TTTGTCTGTGCGTCTGAC            |
| Y382A         | Mut15_F            | CATTGAAGAGgccATGGTGCATGTTGAAG |
|               | Mut15_R            | GGATGGAAGGCAGCTTCT            |
| D409A         | Mut16_F            | TTGGCCACAGcTGACCCTTCT         |
|               | Mut16_R            | ATACACTTTTTTTGTCCACTTG        |
| D453A         | Mut17_F            | GTGATCTGGcTATACATTTTCTC       |
|               | Mut17_R            | TCCACGAAGTGAATTTTC            |
| S469A         | Mut18_F            | TACTTTTTCAgccCAGGTCTG         |
|               | Mut18_R            | CACACTAGGAAGTCTGCC            |

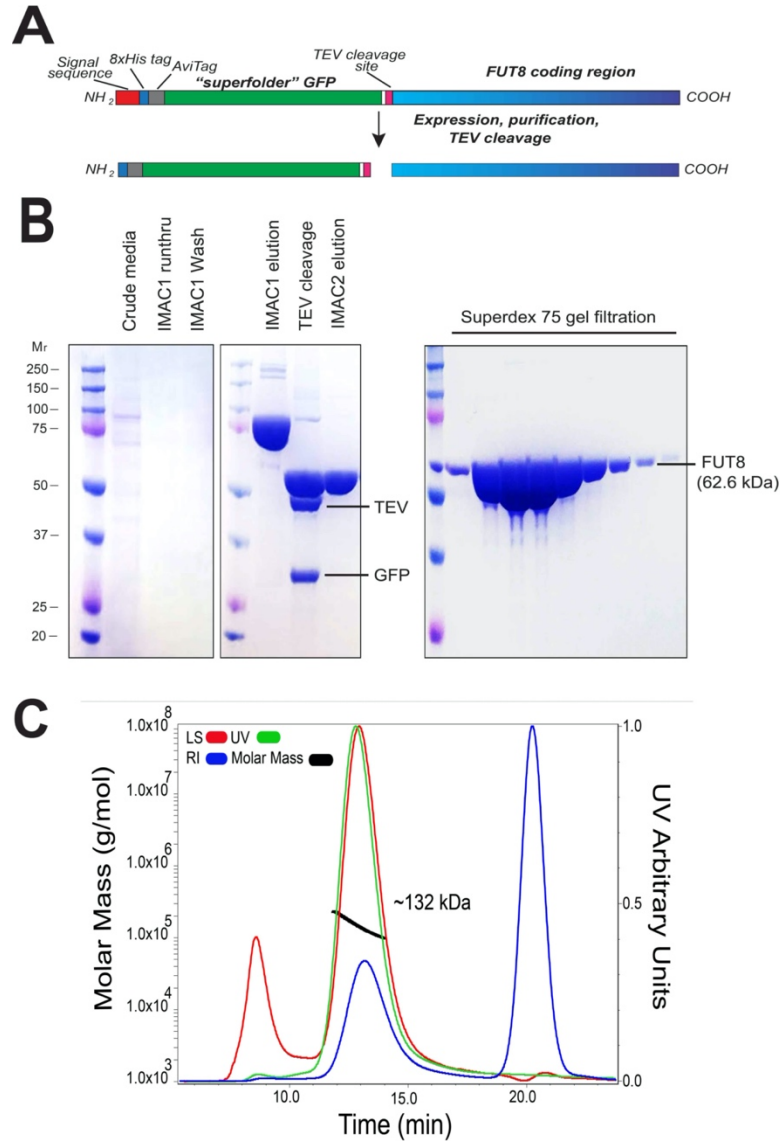

**Supplementary Figure S1. FUT8 expression, purification, and tag/glycan cleavage.** (A) Diagrammatic representation of the recombinant FUT8 fusion protein coding region is shown. The fusion protein has an NH<sub>2</sub>-terminal signal sequence followed by an 8xHis tag, AviTag, superfolder GFP, TEV protease cleavage site, and the catalytic domain of FUT8. (B) Expression of the recombinant product in HEK293F cells resulted in secretion of the fusion protein into the culture medium (*Crude media*), and subsequent Ni<sup>2+</sup>-NTA purification yielded a highly-enriched enzyme preparation (*IMAC1 elution*). Cleavage of the enzyme with TEV protease resulted in removal of the tag sequences (*TEV cleavage*). Ni<sup>2+</sup>-NTA chromatography separated the unbound FUT8 catalytic domain (*IMAC2 elution*) from the bound tag sequences and TEV protease, as the latter were both His-tagged. The enzyme was further purified over Superdex 75 (*Superdex 75 gel filtration*). (C) The purified FUT8 catalytic domain following cleavage with TEV was further characterized by size exclusion-multiangle light scattering (SEC-MALS, see Materials and Methods). A<sub>280</sub> is shown by the green line, refractive index in blue, light scattering in red and calculated molar mass in black. The molecular mass derived from SEC-MALS analysis (132 kDa) is in close agreement with a dimer of the calculated mass for the FUT8 catalytic domain following cleavage with TEV protease (62.6 kDa)

Conservation:  
NodZ\_3six.pdb  
MmPOFUT1\_5ky3.pdb  
HsFUT8:GDP:A2Asn  
HsPOFUT2\_4ap6.pdb  
CePOFUT2\_5foe.pdb  
AtFut1\_5kor.pdb  
Consensus aa:  
Consensus ss:

```
-----  
1 -----L GK--DHEILRRRIENGAKELWFFPLQSELKKLNLEGNELQRHADEFLLDLGHHERSIMTDLYLSSQTDGAGDWREKEAKDLTELVRRTITLQ 92  
-----  
1 INSDKLLGGLLASGFDEDSCLSRYSVHYRKP-----SPYKPPSSYLISKLRNYEKLH 52  
.....
```

Conservation:  
NodZ\_3six.pdb  
MmPOFUT1\_5ky3.pdb  
HsFUT8:GDP:A2Asn  
HsPOFUT2\_4ap6.pdb  
CePOFUT2\_5foe.pdb  
AtFut1\_5kor.pdb  
Consensus aa:  
Consensus ss:

```
-----  
1 -----KERFVVISRR--TGFCDCFLWSLASAWSYAQRTE-----RTLVIIDWRGS-----CYVEQPFNSNAPAFEFEPVE--DIA 63  
1 -----PSWD-----LACYLLYCP-C-MGRFGNQADHFLGLSALAFKLLN-----RTLAVPPWIE-YQHHPPTFN-LHVSYQKYFKLEPLQA 72  
93 NPK-----DCS-----KAKKLVCNINKGCGYCCQLHHVVVYCFMIAYGT-----RTLIIESQNW-----RYA-----TGGVETVFRP 154  
1 -----S-----RRRFLLYDVPNPPAGFNLRDDVYIRIASLTKTL--KTEFWVLVLPWPWGRLYHWQSPDIHQ--VRIPWSEFFDLPSLNK 75  
1 -----EKKFLLYDVPNFGFNLRDDVYMRVANTVRSITDSDGELYLVIPPWGRE-----VALS WRLFDFLESLNH 65  
53 KRCGPGTESYKALKQLDQEHIDGECYVVMWISF--SGLCNRIILSLASVFLYALLT-----RVLLVDRG-----KDADDLFCEP--F 126  
.....c..+@llh.....sg@s.p...hh.hh.hhh.h.....hllls.....p.s.p.hF.....  
.....eeeee.....hhhhhhhhhhhhhhhh.....eeeee.....hhhh hh hhh
```

Conservation:  
NodZ\_3six.pdb  
MmPOFUT1\_5ky3.pdb  
HsFUT8:GDP:A2Asn  
HsPOFUT2\_4ap6.pdb  
CePOFUT2\_5foe.pdb  
AtFut1\_5kor.pdb  
Consensus aa:  
Consensus ss:

```
-----  
64 GVPVICDDRNVQ-----LSF-----EGPFFP-----RWW-----NRPSIDCI--NRP-----DEQIFR-----PR 106  
73 YHRVVSLEDFMENLAPSHWPPEK-----FVAYC-----EVAAQRS PDKKTCPMKE-----GNPFGPFWDQFHVSNFKSEI-----ET 140  
155 VSETCTDR-----SGIS-----TGHWS-----EVAQRS PDKKTCPMKE-----GNPFGPFWDQFHVSNFKSEI-----ET 171  
76 NIPVIEVEQFIA--ESGGPFI--DQVYVQSYAEGWKEGTWEKVDERPCLDQ-----LLYSQDKHEYRGRWFYGYEETRGLNVSC-----S 154  
66 FIPVLEFEDFLD--ENRPI--DQVYVQSYAEGWKEGTWEKVDERPCLDQ-----LLYSQDKHEYRGRWFYGYEEDVSRNFQC-----S 143  
127 LGMSWLL--PLD--FPMTDQFDLQNESSR--GYMYKN-----QVITL--SHLYLHLVHDYGD--D 180  
.....h.h.c...p.....s.....sh.....p.p.l...-h.p.c@s.....  
.....eehhhhhh.....eeree.....eeeee
```

Conservation:  
NodZ\_3six.pdb  
MmPOFUT1\_5ky3.pdb  
HsFUT8:GDP:A2Asn  
HsPOFUT2\_4ap6.pdb  
CePOFUT2\_5foe.pdb  
AtFut1\_5kor.pdb  
Consensus aa:  
Consensus ss:

```
-----  
107 DELTEI EQAREDESEA-----NTIVCDA-----CLMWRCS-----EEAERLIFRNIKIRSEIRARIDALYEEHFSG----- 166  
141 GISF--SASYKEQWTOREPA--KEHVLALPGAP--AQFPVLEE--RELQKY--MVNSDE--MVRTGEALISALH--LV----- 205  
172 -----GEV-KLKN-----VQVVELPIVDLSLHPPYPPLA--VPEDLADRIVRVHGDPA--WVVSQFVKYLI--QFWELEIEEATKLGFK----- 249  
155 VQG--SASI--VAP-LILRN--TSARVMDRAENL--LHDHYG--KEYWDTRRS--MVARHRELVGDEFRSR--LNSTDDA 224  
144 IQG--ISGT--LKD-LIKHNSFSESTSIMVORAEIT--LHEHYGE--VDYWKARRS--MNSNDLVVDADAFRKK--LDSDDKR 215  
181 KMFF--CEG--DQT--PIGK--VEWLVVKTNDYF--VPSLWLIPGFDDELNKLFP--QKA--TVFHHLGRYLF--HFNQVWGLVTRYEYEA--LSH-- 259  
.....b.....hp.....s.....h.slls.h.....h.....h.ch.....h.p.l...-h.p.c@s.....  
.....hhh hhh hh.....eeree.....hhhhhhhhhh.....hhhhhhhhhhhhhhhh
```

Conservation:  
NodZ\_3six.pdb  
MmPOFUT1\_5ky3.pdb  
HsFUT8:GDP:A2Asn  
HsPOFUT2\_4ap6.pdb  
CePOFUT2\_5foe.pdb  
AtFut1\_5kor.pdb  
Consensus aa:  
Consensus ss:

```
-----  
167 -----PSIIGVHVRHAD-----967 9 6-----SELALHQCVMAIR--KAKALSY--P 199  
206 -----PFPYVGHILRIGSDWKNACAMLKDG TAGSHFMAS PQCVGYSRSTATPLTMTMCLPDLKEIQRAVT--LWVRALN-- 276  
250 -----HPVIGVHVRRTDKVGT-----AFHPLEEYMVHVE--EHPQIL--ARRMQV 292  
225 DRIPFQEDWMMKMKVKGSAIGCPYLGVHLRRKDFIWHGR-----CDVPSLEGAVRKIR--SLMKTIR-- 284  
216 DKTKLVDDWTKKPR-RTAIGCPYLGVHLRRKDFIWHGR-----AQPLTPITGAKILQ--DLCKK-- 274  
260 -----ADEKIGIQVRF--IEDPG-----EFQHMVDQISSCTQKEKLEPEVDTLVNTP 305  
.....shlGHLR..s...s.....hlp...phh..h.....  
.....eeeeeee.....hhh
```

Motif 1

Conservation:  
NodZ\_3six.pdb  
MmPOFUT1\_5ky3.pdb  
HsFUT8:GDP:A2Asn  
HsPOFUT2\_4ap6.pdb  
CePOFUT2\_5foe.pdb  
AtFut1\_5kor.pdb  
Consensus aa:  
Consensus ss:

```
-----  
200 KPVVFLGIDTS--AQVLDQVSGLF-----PDVFVVPK-----RSAE-MGIEGGASALIDMYLLAFCAWVIF--FPPTSAFTRYARILV-----PR 274  
277 --ARSVYIATDS--ESYVSEIQQLFKD-----KVRVVS--KLP-----EVAQIDLYILGQADHFIC--NCVSSPTAFVKEERDLHG--RQ 346  
293 DKRNVYVLTDDI--PSLLKEAKTKYPN-----EFISD--NSISWVAGLNHR--YTENSLRQVILDIHFLSCADFLVC--TFSSQVCRVAYEIMQLHPDASAN 382  
285 --LDKVVFVTDVVRKEYEELKLLP-----EMVRFEP-----TWELELYKDGVAITDQWICAFARFFIC--TSVSTFSFRIHREERELGLDPKTT 367  
275 --IQKIYLTDAFDQVEDELKALLNGE-----LEVYRFTD-----TQKLNQGQAIIDQYLCAPAAAFIC--SYESTFTRIQDREIIGFPISIT 356  
306 KHKAVLVISLN--AGYAENLKMYSWEHYPTSTGEMIGVHQPSQ-----EGYKMHNGHFLAEMYLISITNLVT--SAWSTFGYVAQQLGC-----LK 387  
.....p.v@ltDds..pbhpcplp.hh.....lhp.....b.....ALLDb@lhtqtsnhls..s..SsFs..hp.....p.....  
.....eeree.....hhhhhhhhhh.....eeree.....eehhhhhhh
```

Motif 2

Motif 3

Conservation:  
NodZ\_3six.pdb  
MmPOFUT1\_5ky3.pdb  
HsFUT8:GDP:A2Asn  
HsPOFUT2\_4ap6.pdb  
CePOFUT2\_5foe.pdb  
AtFut1\_5kor.pdb  
Consensus aa:  
Consensus ss:

```
-----  
275 IIEFDL-----6-----SNPGHLT--MIDNP----- 292  
347 SSSFQMD----- 353  
383 FHSLLDIYFYGQNAHNQIAIYHQPTADEIPMEPGDIIGVAGNHWDGYSKGVNRRKLGRTGLYPSYKVRKIE-----TVK--YPTYPE-- 465  
368 YNRFCDG-----QEKACE--QPTH--WKITY-- 389  
357 FNRLCPD-----TEPTCE--QPAK--WKIVYSS-- 380  
388 PNILYRPNRRT-----PDPSCG--RAMS-MEPCFHSPPFYDCKAKTGIDTGTGLVPHVHRCEDISWGLKLV 450  
.....hs.....s...p.....p.....
```

Supplementary Figure S2. Structural alignment of fucosyltransferase structures using the PROMALS3D server. The structure of the human FUT8:GDP:A2-Asn complex was aligned with the mouse POFUT1:GDP:Fuc:EGF domain complex (PDB 5KY3 (38)), the *C. elegans* POFUT2:GDP:thrombospondin repeat complex (PDB 5FOE (39)), the human POFUT2:GDP:Fuc complex (PDB 4AP6 (40)), the NodZ:GDP complex (PDB 3SIX (35)), and the AtFUT1:GDP:xylo-oligosaccharide complex (PDB 5KOR (29)) using default parameters in the PROMALS3D server (97). Conserved secondary

structure elements are indicated as helices (*h*) or beta strands (*e*) and consensus amino acid positions are classified by amino acid character (aliphatic (l), aromatic (@), hydrophobic (h), alcohol (o), polar (p), tiny (t), small (s), bulky (b), positively charged (+), negatively charged (-), and charged (c)) or as bold uppercase for conserved. Red boxes represent the three conserved sequence elements previously identified by primary sequence alignment (94, 95). Conserved secondary structure elements for the fucosyltransferases that are indicated in the structural alignment in **Fig. 10** are indicated by the blue boxes. The putative catalytic bases for FUT8 and *C. elegans* POFUT1 are indicated with the bold magenta 'E' with a green circle.



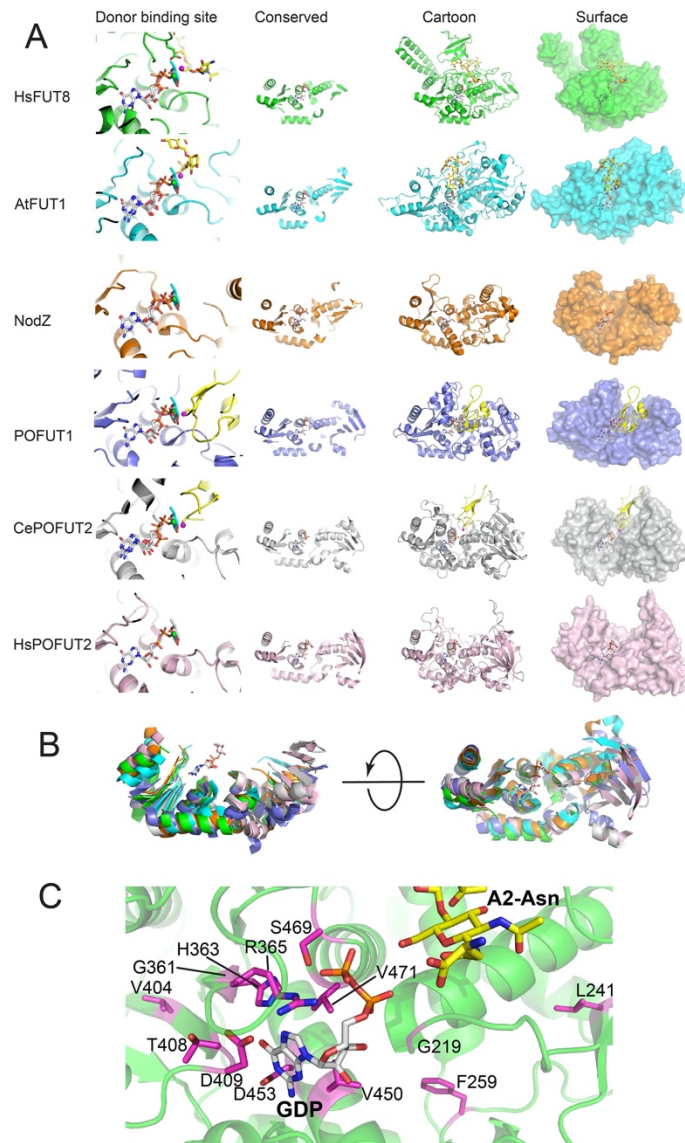

**Supplementary Figure S3. Sequence and structural alignment of FUT8 with other related GTs.** The structures of FUT8:GDP:A2-Asn, mouse POFUT1:GDP-Fuc:EGF domain complex (PDB 5KY3 (38)), *C. elegans* POFUT2:GDP:thrombospondin repeat complex (PDB 5FOE (39)), human POFUT2:GDP-Fuc complex (PDB 4AP6 (40)), NodZ:GDP complex (PDB 3SIX (35)), and *Arabidopsis* FUT1:GDP:xylo-oligosaccharide complex (PDB 5KOR (29)) were aligned in Coot (111) followed by manual adjustment in PyMOL. **(A)** Individual structures are displayed in surface representation (*Surface*) or cartoon representation (*Cartoon*) with bound GDP or GDP-Fuc shown in white stick representation. Acceptor ligands are shown as yellow sticks (glycan acceptors) or cartoon (POFUTs) representations. Conserved regions identified in the PROMALS3D alignment (blue boxes in Fig. 9) were extracted and shown as cartoon representations (*Conserved*). A zoom-in to the GDP-Fuc donor binding site (*Donor Binding Site*) is shown with the respective protein in cartoon representation and the donor in stick representation. For each of the donor binding site structures a representation of GDP-Fuc derived from the human POFUT2 structure is also superimposed to indicate the position of the bound intact sugar donor where the other complexes contained only GDP. The latter GDP-Fuc molecule is represented with the Fuc residue in cyan sticks and the C1 as a green sphere. When the acceptor structure is present, the hydroxyl nucleophile is represented as a magenta sphere. **(B)** The conserved structural elements identified in the PROMALS3D analysis (*Conserved* column in Panel A) are displayed as an overlay of the respective structures in two

different orientations. (C) Thirteen residues were completely conserved among the six structures. These conserved residues are shown within the FUT8:GDP:A2-Asn structure (magenta stick representation), where 9 residues are associated with the GDP binding site. GDP shown in white stick representation and the A2-Asn acceptor shown in yellow stick representation.
